# Supplementary material for: Anesthesia-Sepsis-Associated Alterations in Liver Gene Expression Profiles and Mitochondrial Oxidative Phosphorylation Complexes
Source: PubMed Central journal article supplement (PMC7775734; doi:10.3389/fmed.2020.581082), 2020-12-18
Supplement: Image_1.pdf [file Image_1.pdf]

Supplementary Figure 1, Volcano plot of differentially expressed genes in sepsis,

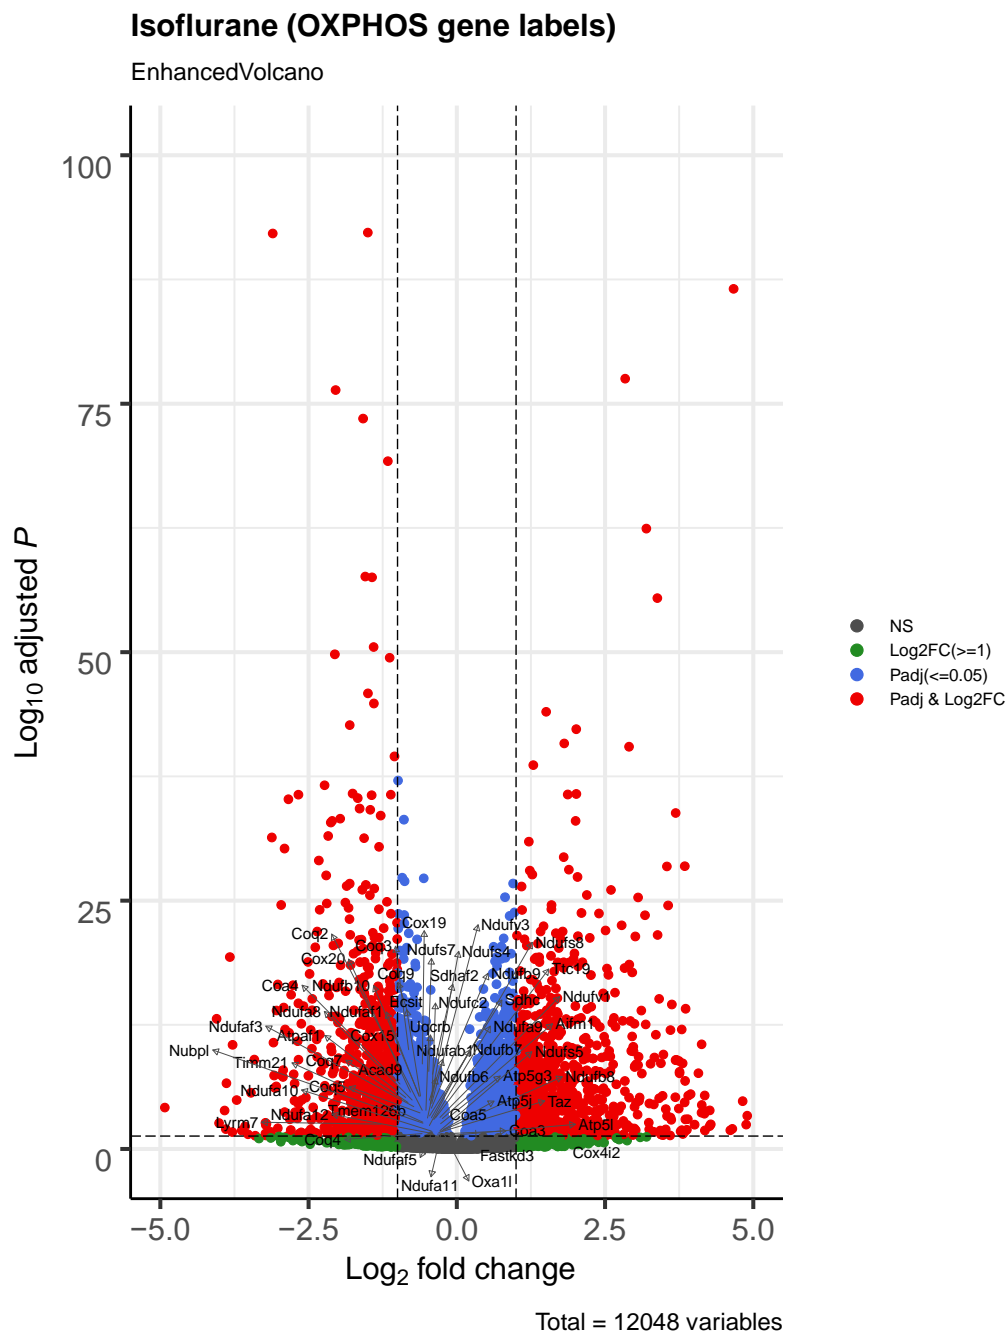

**Figure 1. (A) Volcano plot of differentially expressed genes in sepsis with an Isoflurane background.** Genes related to OXPHOS that were significant (adjusted P-value<0.05 and log<sub>2</sub> fold change>1) are labelled in the plot.

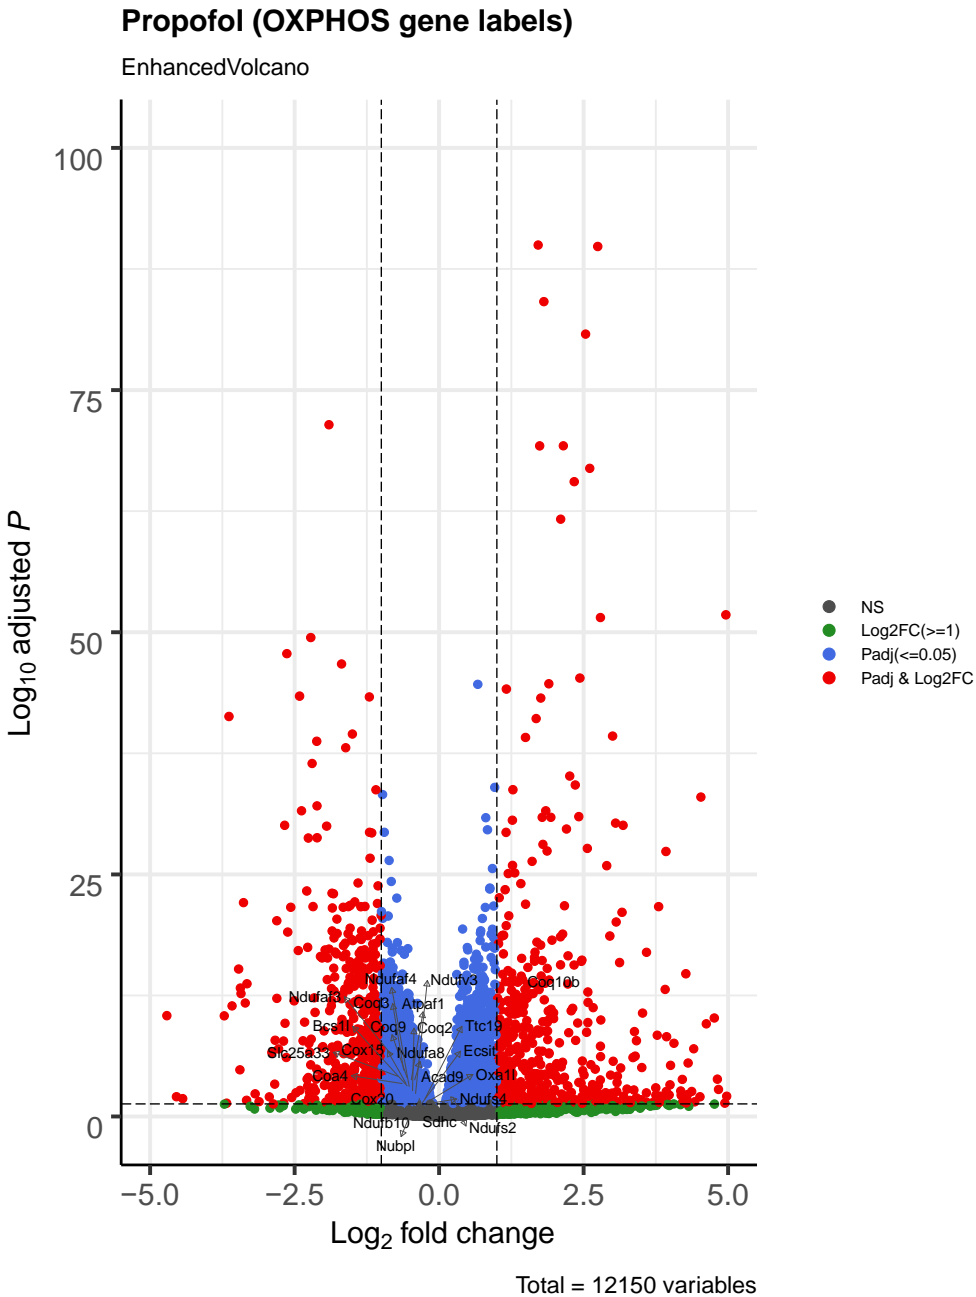

**Figure 1. (B) Volcano plot of differentially expressed genes in sepsis with a Propofol background.** Genes related to OXPHOS that were significant (adjusted P-value<0.05 and log<sub>2</sub> fold change>1) are labelled in the plot.
